# Supplementary material
Source: ML conference proceedings conference paper supplement (https://proceedings.neurips.cc/paper_files/paper/2013/hash/9683cc5f89562ea48e72bb321d9f03fb-Abstract.html)
Supplement: Supplementary file [file 9683cc5f89562ea48e72bb321d9f03fb-Supplemental.zip]

---

# Supplementary Material: Sketching Structured Matrices For Faster Nonlinear Regression

---

**Haim Avron**  
 IBM T.J. Watson Research Center  
 Yorktown Heights, NY 10598  
 haimav@us.ibm.com

**Vikas Sindhwani**  
 IBM T.J. Watson Research Center  
 Yorktown Heights, NY 10598  
 vsindhw@us.ibm.com

**David P. Woodruff**  
 IBM Almaden Research Center  
 San Jose, CA 95120  
 dpwoodru@us.ibm.com

The supplementary material contains a complete version (including proofs) of Section 3 (Fast Structured Regression with Sketching).

## 1 Fast Structured Regression with Sketching

We now develop our randomized solvers for block-Vandermonde structured  $l_p$  regression problems. In the theoretical developments below, we consider unconstrained regression though our results generalize straightforwardly to convex constraint sets  $\mathcal{C}$ .

### 1.1 Background

We begin by giving some notation and then provide necessary technical background.

Given a matrix  $M \in \mathbb{R}^{n \times d}$ , let  $M_1, \dots, M_d$  be the columns of  $M$ , and  $M^1, \dots, M^n$  be the rows of  $M$ . Define  $\|M\|_1$  to be the element-wise  $\ell_1$  norm of  $M$ . That is,  $\|M\|_1 = \sum_{i \in [d]} \|M_i\|_1$ . Let  $\|M\|_F = \left( \sum_{i \in [n], j \in [d]} M_{i,j}^2 \right)^{1/2}$  be the Frobenius norm of  $M$ . Let  $[n] = \{1, \dots, n\}$ .

#### 1.1.1 Well-Conditioning and Sampling of A Matrix

**Definition 1 (( $(\alpha, \beta, 1)$ -well-conditioning [7])** *Given a matrix  $M \in \mathbb{R}^{n \times d}$ , we say  $M$  is  $(\alpha, \beta, 1)$ -well-conditioned if (1)  $\|x\|_\infty \leq \beta \|Mx\|_1$  for any  $x \in \mathbb{R}^d$ , and (2)  $\|M\|_1 \leq \alpha$ .*

**Lemma 2 (Implicit in [14])** *Suppose  $S$  is an  $r \times n$  matrix so that for all  $x \in \mathbb{R}^d$ ,*

$$\|Mx\|_1 \leq \|SMx\|_1 \leq \kappa \|Mx\|_1.$$

*Let  $Q \cdot R$  be a QR-decomposition of  $SM$ , so that  $QR = SM$  and  $Q$  has orthonormal columns. Then  $MR^{-1}$  is  $(d\sqrt{r}, \kappa, 1)$ -well-conditioned.*

**Proof:** For any standard unit vector  $e_i$ ,

$$\|MR^{-1}e_i\|_1 \leq \|SMR^{-1}e_i\|_1 \leq \sqrt{r} \|SMR^{-1}e_i\|_2 = \sqrt{r},$$

and so  $\|MR^{-1}\|_1 = \sum_i \|MR^{-1}e_i\|_1 \leq d\sqrt{r}$ . Also, for any  $x$ ,

$$\kappa \|MR^{-1}x\|_1 \geq \|SMR^{-1}x\|_1 \geq \|SMR^{-1}x\|_2 = \|x\|_2 \geq \|x\|_\infty.$$

■

**Theorem 3 (Theorem 3.2 of [7])** Suppose  $U$  is an  $(\alpha, \beta, 1)$ -well-conditioned basis of an  $n \times d$  matrix  $A$ . For each  $i \in [n]$ , let  $p_i \geq \min\left(1, \frac{\|U_i\|_1}{t\|U\|_1}\right)$ , where  $t \geq 32\alpha\beta(d \ln(\frac{12}{\varepsilon}) + \ln(\frac{2}{\delta})) / (\varepsilon^2)$ . Suppose we independently sample each row with probability  $p_i$ , and create a diagonal matrix  $S$  where  $S_{i,i} = 0$  if  $i$  is not sampled, and  $S_{i,i} = 1/p_i$  if  $i$  is sampled. Then with probability at least  $1 - \delta$ , simultaneously for all  $x \in \mathbb{R}^d$  we have:

$$||SAx||_1 - \|Ax\|_1 \leq \varepsilon \|Ax\|_1.$$

We also need the following method of quickly obtaining approximations to the  $p_i$ 's in Theorem 3, which was originally given in Mahoney et al. [10].

**Theorem 4** Let  $U \in \mathbb{R}^{n \times d}$  be an  $(\alpha, \beta, 1)$ -well-conditioned basis of an  $n \times d$  matrix  $A$ . Suppose  $G$  is a  $d \times O(\log n)$  matrix of i.i.d. Gaussians. Let  $p_i = \min\left(1, \frac{\|U_i G\|_1}{t2\sqrt{d}\|UG\|_1}\right)$  for all  $i$ , where  $t$  is as in Theorem 3. Then with probability  $1 - 1/n$ , over the choice of  $G$ , the following occurs. If we sample each row with probability  $p_i$ , and create  $S$  as in Theorem 3, then with probability at least  $1 - \delta$ , over our choice of sampled rows, simultaneously for all  $x \in \mathbb{R}^d$  we have:

$$||SAx||_1 - \|Ax\|_1 \leq \varepsilon \|Ax\|_1.$$

**Proof:** Since  $G$  is a  $d \times O(\log n)$  matrix of i.i.d. Gaussians, we have that with probability at least  $1 - 1/n$ , over the choice of  $G$ , that

$$\|U_i G\|_1 \geq \|U_i G\|_2 \geq 1/2 \|U_i\|_2 \geq 1/(2\sqrt{d}) \|U_i\|_1,$$

simultaneously for all  $i \in [n]$ . The theorem now follows by Theorem 3. ■

### 1.1.2 Oblivious Subspace Embeddings

Let  $A \in \mathbb{R}^{n \times d}$ . We assume that  $n > d$ . Let  $\text{nnz}(A)$  denote the number of non-zero entries of  $A$ . We can assume  $\text{nnz}(A) \geq n$  and that there are no all-zero rows or columns in  $A$ .

**$\ell_2$  Norm** The following family of matrices is due to Charikar et al. [5] (see also [8]): For a parameter  $t$ , define a random linear map  $\Phi D : \mathbb{R}^n \rightarrow \mathbb{R}^t$  as follows:

- $h : [n] \mapsto [t]$  is a random map so that for each  $i \in [n]$ ,  $h(i) = t'$  for  $t' \in [t]$  with probability  $1/t$ .
- $\Phi \in \{0, 1\}^{t \times n}$  is a  $t \times n$  binary matrix with  $\Phi_{h(i), i} = 1$ , and all remaining entries 0.
- $D$  is an  $n \times n$  random diagonal matrix, with each diagonal entry independently chosen to be  $+1$  or  $-1$  with equal probability.

We will refer to  $\Pi = \Phi D$  as a *sparse embedding matrix*.

For certain  $t$ , it was recently shown that with probability at least .99 over the choice of  $\Phi$  and  $D$ , for any fixed  $A \in \mathbb{R}^{n \times d}$ , we have simultaneously for all  $x \in \mathbb{R}^d$ ,

$$(1 - \varepsilon) \cdot \|Ax\|_2 \leq \|\Pi Ax\|_2 \leq (1 + \varepsilon) \cdot \|Ax\|_2,$$

that is, the entire column space of  $A$  is preserved [6]. The best known value of  $t$  is  $t = O(d^2/\varepsilon^2)$  [11, 12].

We will also use an oblivious subspace embedding known as the *subsampling randomized Hadamard transform*, or SRHT. See Boutsidis and Gittens's recent article for a state-the-art analysis [3].

**Theorem 5 (Lemma 6 in [3])** There is a distribution over linear maps  $\Pi'$  such that with probability .99 over the choice of  $\Pi'$ , for any fixed  $A \in \mathbb{R}^{n \times d}$ , we have simultaneously for all  $x \in \mathbb{R}^d$ ,

$$(1 - \varepsilon) \cdot \|Ax\|_2 \leq \|\Pi' Ax\|_2 \leq (1 + \varepsilon) \cdot \|Ax\|_2,$$

where the number of rows of  $\Pi'$  is  $t' = O(\varepsilon^{-2}(\log d)(\sqrt{d} + \sqrt{\log n})^2)$ , and the time to compute  $\Pi' A$  is  $O(nd \log t')$ .

We note that there are implicit connections between these embedding results and the compressed sensing literature, and the well-known restricted isometry property (RIP); see, for example, [4, 1]

**$\ell_1$  Norm** The results can be generalized to subspace embeddings with respect to the  $\ell_1$ -norm [6, 11, 16]. The best known bounds are due to Woodruff and Zhang [16], so we use their family of embedding matrices in what follows. Here the goal is to design a distribution over matrices  $\Psi$ , so that with probability at least .99, for any fixed  $A \in \mathbb{R}^{n \times d}$ , simultaneously for all  $x \in \mathbb{R}^d$ ,

$$\|Ax\|_1 \leq \|\Psi Ax\|_1 \leq \kappa \|Ax\|_1,$$

where  $\kappa > 1$  is a distortion parameter. The best known value of  $\kappa$ , independent of  $d$ , is  $\kappa = O(d^2 \log^2 d)$  [16]. Their family of matrices  $\Psi$  is chosen to be of the form  $\Pi \cdot E$ , where  $\Pi$  is as above with parameter  $t = d^{1+\gamma}$  for arbitrarily small constant  $\gamma > 0$ , and  $E$  is a diagonal matrix with  $E_{i,i} = 1/u_i$ , where  $u_1, \dots, u_n$  are independent standard exponentially distributed random variables.

Recall that an exponential distribution has support  $x \in [0, \infty)$ , probability density function (PDF)  $f(x) = e^{-x}$  and cumulative distribution function (CDF)  $F(x) = 1 - e^{-x}$ . We say a random variable  $X$  is exponential if  $X$  is chosen from the exponential distribution.

Again, we note the implicit connection to the notion of  $\ell_1$ -RIP [2].

### 1.1.3 Fast Vandermonde Multiplication

**Lemma 6** *Let  $x_0, \dots, x_{n-1} \in \mathbb{R}$  and  $V = V_{q,n}(x_0, \dots, x_{n-1})$ . For any  $y \in \mathbb{R}^n$  and  $z \in \mathbb{R}^q$ , the matrix-vector products  $Vy$  and  $V^T z$  can be computed in  $O((n+q) \log^2 q)$  time.*

**Proof:** It is known that if  $n \leq q$ , then  $Vy$  and  $V^T z$  can be computed in  $O(q \log^2 q)$  time [13, 15, Theorem 2.11]. For  $n > q$ , write  $n = \alpha q + \beta$ , where  $\alpha$  is a non-negative integer and  $0 \leq \beta < q$ . The lemma follows in general by writing

$$\left[ V = V_{q,q}(x_0, \dots, x_{q-1}) \mid V_{q,q}(x_q, \dots, x_{2q-1}) \mid \dots \mid V_{q,q}(x_{i_q}, \dots, x_n) \right],$$

and computing  $Vy$  or  $V^T z$  using block multiplication. ■

## 1.2 Main Lemmas

We handle  $p = 2$  and  $p = 1$  separately below. Our algorithms make use of the following subroutines given by our next lemmas.

**Lemma 7 (Efficient Multiplication of a Sparse Sketch and  $T_q(A)$ )** *Let  $A \in \mathbb{R}^{n \times d}$ . Let  $\Pi = \Phi D$  be a sparse embedding matrix for the  $\ell_2$  norm with associated hash function  $h : [n] \rightarrow [t]$  for an arbitrary value of  $t$ , and let  $E$  be any diagonal matrix. There is a deterministic algorithm to compute the product  $\Phi \cdot D \cdot E \cdot T_q(A)$  in  $O((\text{nnz}(A) + dtq) \log^2 q)$  time.*

**Proof:** By definition of  $T_q(A)$ , it suffices to prove this when  $d = 1$ . Indeed, if we can prove for a column vector  $a$  that the product  $\Phi \cdot D \cdot E \cdot T_q(a)$  can be computed in  $O((\text{nnz}(a) + tq) \log^2 q)$  time, then by linearity it will follow that the product  $\Phi \cdot D \cdot E \cdot T_q(A)$  can be computed in  $O((\text{nnz}(A) + dtq) \log^2 q)$  time for general  $d$ . Hence, in what follows, we assume that  $d = 1$  and our matrix  $A$  is a column vector  $a$ . Notice that if  $a$  is just a column vector, then  $T_q(A)$  is equal to  $V_{q,n}(a_1, \dots, a_n)^T$ .

For each  $k \in [t]$ , define the ordered list  $L^k = (i \text{ such that } a_i \neq 0 \text{ and } h(i) = k)$ . Let  $\ell_k = |L^k|$ . We define an  $\ell_k$ -dimensional vector  $\sigma^k$  as follows. If  $p_k(i)$  is the  $i$ -th element of  $L^k$ , we set

$$\sigma_i^k = D_{p_k(i), p_k(i)} \cdot E_{p_k(i), p_k(i)}.$$

Let  $V^k$  be the submatrix of  $V_{q,n}(a_1, \dots, a_n)^T$  whose rows are in the set  $L^k$ . Notice that  $V^k$  is itself the transpose of a Vandermonde matrix, where the number of rows of  $V^k$  is  $\ell_k$ . By Theorem 6, the product  $\sigma^k V^k$  can be computed in  $O((\ell_k + q) \log^2 q)$  time. Notice that  $\sigma^k V^k$  is equal to the  $k$ -th row of the product  $\Phi D E T_q(a)$ . Therefore, the entire product  $\Phi D E T_q(a)$  can be computed in

$$O\left(\sum_k \ell_k \log^2 q\right) = O((\text{nnz}(a) + tq) \log^2 q)$$

time. ■

---

**Algorithm 1** StructRegression-2

---

- 1: **Input:** An  $n \times d$  matrix  $A$  with  $\text{nnz}(A)$  non-zero entries, an  $n \times 1$  vector  $b$ , an integer degree  $q$ , and an accuracy parameter  $\varepsilon > 0$ .
  - 2: **Output:** With probability at least .98, a vector  $x' \in \mathbb{R}^d$  for which  $\|T_q(A)x' - b\|_2 \leq (1 + \varepsilon) \min_x \|T_q(A)x - b\|_2$ .
  - 3: Let  $\Pi = \Phi D$  be a sparse embedding matrix for the  $\ell_2$  norm with  $t = O((dq)^2/\varepsilon^2)$ .
  - 4: Compute  $\Pi T_q(A)$  using the efficient algorithm of Lemma 7 with  $E$  set to the identity matrix.
  - 5: Compute  $\Pi b$ .
  - 6: Compute  $\Pi'(\Pi T_q(A))$  and  $\Pi' \Pi b$ , where  $\Pi'$  is a subsampled randomized Hadamard transform of Theorem 5 with  $t' = O(\varepsilon^{-2}(\log(dq))(\sqrt{dq} + \sqrt{\log t})^2)$  rows.
  - 7: Output the minimizer  $x'$  of  $\|\Pi' \Pi T_q(A)x' - \Pi' \Pi b\|_2$ .
- 

**Lemma 8 (Efficient Multiplication of  $T_q(A)$  on the Right)** *Let  $A \in \mathbb{R}^{n \times d}$ . For any vector  $z$ , there is a deterministic algorithm to compute the matrix vector product  $T_q(A) \cdot z$  in  $O((\text{nnz}(A) + dq) \log^2 q)$  time.*

**Proof:** We will prove that for a column vector  $a$ , that  $T_q(a) \cdot z^i$ , where  $z^i$  denotes the  $i$ -th block of  $q$  coordinates of  $z$ , can be computed in  $O((\text{nnz}(a) + q) \log^2 q)$  time. Moreover,  $T_q(a) \cdot z^i$  will be an  $n$ -dimensional vector with  $\text{nnz}(a)$  non-zero entries. This will be sufficient to establish the lemma since we have  $T_q(A) \cdot z = \sum_{i=1}^d T_q(A_i) \cdot z^i$ . Then if  $T_q(A_i)z^i$  can be computed in  $O((\text{nnz}(A_i) + dq) \log^2 q)$  time, it follows that in  $O((\text{nnz}(A) + dq) \log^2 q)$  time, we can compute  $T_q(A_i)z^i$  simultaneously for all  $i$ . Moreover, as each  $T_q(A_i)z^i$  is  $n$ -dimensional and has  $O(\text{nnz}(A_i))$  non-zero entries, the resulting vectors can be added together in  $O(\text{nnz}(A))$  time.

It remains to prove the claimed result for a column vector  $a = (a_1, \dots, a_n)$ . Notice that  $T_q(a)$  is equal to  $V_{q,n}(a_1, \dots, a_n)^T$ . Let  $L = (i \text{ such that } a_i \neq 0 \text{ and })$ , and  $\ell = |L| = \text{nnz}(a)$ . Let  $V$  be the submatrix of  $V_{q,n}(a_1, \dots, a_n)^T$  containing the rows in  $L$ . Note that  $V$  is itself the transpose of a Vandermonde matrix, where the number of rows of  $V$  is  $\ell$ . Let  $z_L^i$  be the  $\ell$ -dimensional vector whose  $j$ -th entry equals the  $j$ -th non-zero coordinate in  $z^i$ . By Theorem 6, the product  $Vz_L^i$  can be computed in  $O((\ell + q) \log^2 q)$  time. Notice that the non-zero entries of  $T_q(a) \cdot z^i$  are exactly the entries of  $Vz_L^i$ , where the  $j$ -th entry of  $T_q(a) \cdot z$  equals the entry of  $Vz_L$  corresponding to the  $j$ -th entry in  $L$ . It follows that we have computed  $T_q(a) \cdot z^i$  in  $O((\text{nnz}(a) + q) \log^2 q)$  time and is an  $n$ -dimensional vector with  $\text{nnz}(a)$  non-zero entries. ■

**Lemma 9 (Efficient Multiplication of  $T_q(A)$  on the Left)** *Let  $A \in \mathbb{R}^{n \times d}$ . For any vector  $z$ , there is a deterministic algorithm to compute the matrix vector product  $z \cdot T_q(A)$  in  $O((\text{nnz}(A) + dq) \log^2 q)$  time.*

**Proof:** We will prove that for a column vector  $a$ , that  $zT_q(a)$  can be computed in  $O((\text{nnz}(a) + q) \log^2 q)$  time. This will be sufficient to establish the lemma since then the overall time complexity is  $\sum_{i=1}^d O((\text{nnz}(A_i) + q) \log^2 q) = O((\text{nnz}(A) + dq) \log^2 q)$ .

It remains to prove the claimed result for a column vector  $a = (a_1, \dots, a_n)$ . Notice that  $T_q(a)$  is equal to  $V_{q,n}(a_1, \dots, a_n)^T$ . Let  $L = (i \text{ such that } a_i \neq 0 \text{ and })$ , and  $\ell = |L| = \text{nnz}(a)$ . Let  $V$  be the submatrix of  $V_{q,n}(a_1, \dots, a_n)^T$  containing the rows in  $L$ . Note that  $V$  is itself the transpose of a Vandermonde matrix, where the number of rows of  $V$  is  $\ell$ . Let  $z_L$  be the  $\ell$ -dimensional vector whose  $j$ -th entry equals the  $j$ -th non-zero coordinate in  $z$ . By Theorem 6, the product  $z_L \cdot V$  can be computed in  $O((\ell + q) \log^2 q) = O((\text{nnz}(a) + q) \log^2 q)$  time. ■

### 1.3 Fast $\ell_2$ -regression

We start by considering the structured regression problem in the case  $p = 2$ . We give an algorithm for this problem in Figure ??.

**Theorem 10** *Algorithm STRUCTREGRESSION-2 solves w.h.p the structured regression with  $p = 2$  in time*

$$O(\text{nnz}(A) \log^2 q) + \text{poly}(dq/\varepsilon).$$

**Proof:** By the properties of a sparse embedding matrix (see Section 1.1.2), with probability at least .99, for  $t = O((dq)^2/\varepsilon^2)$ , we have simultaneously for all  $y$  in the span of the columns of  $T_q(A)$  adjoined with  $b$ ,

$$(1 - \varepsilon)\|y\|_2 \leq \|\Pi y\|_2 \leq (1 + \varepsilon)\|y\|_2,$$

since the span of this space has dimension at most  $dq + 1$ . By Theorem 5, we further have that with probability .99, for all vectors  $z$  in the span of the columns of  $\Pi(T_q(A) \circ b)$ ,

$$(1 - \varepsilon)\|z\|_2 \leq \|\Pi' z\|_2 \leq (1 + \varepsilon)\|z\|_2.$$

It follows that for all vectors  $x \in \mathbb{R}^d$ ,

$$(1 - O(\varepsilon))\|T_q(A)x - b\|_2 \leq \|\Pi' \Pi(T_q(A)x - B)\|_2 \leq (1 + O(\varepsilon))\|T_q(A)x - b\|_2.$$

It follows by a union bound that with probability at least .98, the output of STRUCTREGRESSION-2 is a  $(1 + \varepsilon)$ -approximation.

For the time complexity,  $\Pi T_q(A)$  can be computed in  $O((\text{nnz}(A) + dtq) \log^2 q)$  by Lemma 7, while  $\Pi b$  can be computed in  $O(n)$  time. The remaining steps can be performed in  $\text{poly}(dq/\varepsilon)$  time, and therefore the overall time is  $O(\text{nnz}(A) \log^2 q) + \text{poly}(dq/\varepsilon)$ .  $\blacksquare$

### 1.3.1 Logarithmic Dependence on $1/\varepsilon$

The STRUCTREGRESSION-2 algorithm can be modified to obtain a running time with a logarithmic dependence on  $\varepsilon$  by combining sketching-based methods with iterative ones.

The analysis follows that of Section 7.7 of [6], but here we additionally use the fast right matrix-vector multiplication algorithm associated with Vandermonde matrices in the iterative algorithm.

Define the condition number  $\kappa(B^\top B) = \frac{\sup_{x, \|x\|=1} \|Bx\|^2}{\inf_{x, \|x\|=1} \|Bx\|^2}$ , and let  $x^0, x^1, \dots$  be the estimates generated by CG on  $B^\top B$  with righthand side equal to  $B^\top b$ . It is well-known that

$$\frac{\|B(x^{(m)} - x^*)\|^2}{\|B(x^{(0)} - x^*)\|^2} \leq 2 \left( \frac{\sqrt{\kappa(B^\top B)} - 1}{\sqrt{\kappa(B^\top B)} + 1} \right)^m. \quad (1)$$

where  $B^\top Bx^* = B^\top b$  [9, Theorem 10.2.6]. Thus the running time depends on the condition number. The running time per iteration is the time needed to compute matrix-vector products  $Bx$  and  $B^\top x$ , plus  $O(n + d)$  for vector arithmetic. Here we set  $B = T_q(A)$  for an input matrix  $A$ . By Lemma 8, for a vector  $x$ , given  $A$  and  $x$  the matrix-vector product  $T_q(A) \cdot x$  can be computed in  $O((\text{nnz}(A) + dq) \log^2 q)$  time.

Suppose we run STRUCTREGRESSION-2 with constant  $\varepsilon = \varepsilon_0$ . Let  $Q \cdot R$  be a QR-decomposition of  $\Pi' \Pi T_q(A)$ . Then since  $\|\Pi' \Pi T_q(A)x\|_2 = (1 \pm \varepsilon_0)\|T_q(A)x\|_2$  for all  $x \in \mathbb{R}^d$ , that is  $\Pi' \Pi$  is a subspace embedding for  $\ell_2$ , we have for any unit  $x \in \mathbb{R}^d$ ,

$$\|T_q(A) \cdot R^{-1}x\|_2 \leq \frac{1}{1 - \varepsilon_0} \|\Pi' \Pi T_q(A)R^{-1}x\|_2 = \frac{1}{1 - \varepsilon_0},$$

where the equality uses that  $\Pi' \Pi T_q(A) = Q \cdot R$  where  $Q$  has orthonormal columns. Similarly,

$$\|T_q(A) \cdot R^{-1}x\|_2 \geq \frac{1}{1 + \varepsilon_0} \|\Pi' \Pi T_q(A)R^{-1}x\|_2 = \frac{1}{1 + \varepsilon_0}.$$

It follows that the condition number

$$\kappa(T_q(A)R^{-1}) \leq \frac{(1 + \varepsilon_0)^2}{(1 - \varepsilon_0)^2}.$$

That is,  $T_q(A)R^{-1}$  is well-conditioned. Plugging this into (1), after  $m$  iterations  $\|AR(x^{(m)} - x^*)\|^2$  is at most  $2\varepsilon_0^m$  times its starting value. Starting with a solution  $x^{(0)}$  with relative error at most 1, and applying  $1 + \log(1/\varepsilon)$  iterations of a conjugate-gradient like method with  $\varepsilon_0 = 1/e$ , the relative error is reduced to  $\varepsilon$  and the total work is  $O((\text{nnz}(A) + dq) \log(1/\varepsilon)) + \text{poly}(dq)$ . We summarize this derivation in the following theorem.

**Theorem 11** *There is an algorithm which solves the structured regression problem with  $p = 2$  in time  $O((\text{nnz}(A) + dq) \log(1/\varepsilon)) + \text{poly}(dq)$  w.h.p.*

---

**Algorithm 2** StructRegression-1

---

- 1: **Input:** An  $n \times d$  matrix  $A$  with  $\text{nnz}(A)$  non-zero entries, an  $n \times 1$  vector  $b$ , an integer degree  $q$ , and an accuracy parameter  $\varepsilon > 0$ .
  - 2: **Output:** With probability at least .98, a vector  $x' \in \mathbb{R}^d$  for which  $\|T_q(A)x' - b\|_1 \leq (1 + \varepsilon) \min_x \|T_q(A)x - b\|_1$ .
  - 3: Let  $\Psi = \Pi E = \Phi D E$  be a subspace embedding matrix for the  $\ell_1$  norm with  $t = (dq + 1)^{1+\gamma}$  for an arbitrarily small constant  $\gamma > 0$ .
  - 4: Compute  $\Psi T_q(A) = \Pi E T_q(A)$  using the efficient algorithm of Lemma 7.
  - 5: Compute  $\Psi b = \Pi E b$ .
  - 6: Compute a QR-decomposition of  $\Psi(T_q(A) \circ b)$ , where  $\circ$  denotes the adjoining of column vector  $b$  to  $T_q(A)$ .
  - 7: Let  $G$  be a  $(dq + 1) \times O(\log n)$  matrix of i.i.d. Gaussians.
  - 8: Compute  $R^{-1} \cdot G$ .
  - 9: Compute  $(T_q(A) \circ b) \cdot (R^{-1} G)$  using the efficient algorithm of Lemma 8 applied to each of the columns of  $R^{-1} G$ .
  - 10: Let  $S$  be the diagonal matrix of Theorem 4 formed by sampling  $\tilde{O}(q^{1+\gamma/2} d^{4+\gamma/2} \varepsilon^{-2})$  rows of  $T_q(A)$  and corresponding entries of  $b$  using the scheme of Theorem 4.
  - 11: Output the minimizer  $x'$  of  $\|ST_q(A)x' - Sb\|_1$ .
- 

#### 1.4 Fast $\ell_1$ -regression

We now consider the structured regression in the case  $p = 1$ . The algorithm in this case is more complicated than that for  $p = 2$ , and is given in Figure (??).

**Theorem 12** *Algorithm STRUCTREGRESSION-1 solves w.h.p the structured regression in problem with  $p = 1$  in time*

$$O(\text{nnz}(A) \log n \log^2 q) + \text{poly}(dq\varepsilon^{-1} \log n).$$

**Proof:** By the properties of a subspace embedding matrix for  $\ell_1$  (see Section 1.1.2), with probability at least .99, for  $t = (dq + 1)^{1+\gamma}$ , we have simultaneously for all  $y$  in the span of the columns of  $T_q(A)$  adjoined with  $b$ ,

$$\|y\|_1 \leq \|\Psi y\|_1 \leq \kappa \|y\|_1,$$

where  $\kappa = O(d^2 \log^2 d)$ . By Theorem 4, we further have that with probability .99, for all vectors in the span of the columns of  $T_q(A)$  adjoined with  $b$ ,

$$(1 - \varepsilon) \|y\|_1 \leq \|Sy\|_1 \leq (1 + \varepsilon) \|y\|_1.$$

It follows by a union bound that with probability at least .98, the output of GENADDITIVE-1 is a  $(1 + \varepsilon)$ -approximation.

For the time complexity,  $\Psi T_q(A)$  can be computed in  $O((\text{nnz}(A) + tdq) \log^2 q)$  time by Lemma 7, while  $\Psi b$  can be computed in  $O(n)$  time. Steps 4-6 can be performed in  $\text{poly}(dq \log n)$  time. By Lemma 8, Step 7 can be performed in  $O((\text{nnz}(A) + dq) \log^2 q \log n)$  time. Step 8 can be computed in  $O(n \log n)$  time, and Step 9 can be done in  $\text{poly}(dq\varepsilon^{-1})$  time. ■

**Remark (Constrained Regression):** Here we note the simple, though useful, observation that our algorithms also solve the constrained version of regression in which there is a constraint set  $\mathcal{C}$  and we require  $x \in \mathcal{C}$ . Indeed, the only change is in Step 5 of STRUCTREGRESSION-2 and Step 9 of STRUCTREGRESSION-1 to instead compute the minimizer  $x'$  over  $x' \in \mathcal{C}$ . Since  $|\Pi' \Pi T_q(A)x' - \Pi' \Pi b|_2 = (1 \pm \varepsilon) \|T_q(A)x' - b\|_2$  for all  $x$  in STRUCTREGRESSION-2, and since  $\|ST_q(A)x' - Sb\|_1 = (1 \pm \varepsilon) \|T_q(A)x' - b\|_1$  for all  $x$  in STRUCTREGRESSION-1, this is valid.

#### References

- [1] R. Baraniuk, M. Davenport, R. DeVore, and M. Wakin. A simple proof of the restricted isometry property for random matrices. *Constructive Approximation*, 28(3):253–263, 2008.
- [2] R. Berinde, A. Gilbert, P. Indyk, H. Karloff, and M. Strauss. Combining geometry and combinatorics: A unified approach to sparse signal recovery. In *Communication, Control, and Computing, 2008 46th Annual Allerton Conference on*, pages 798–805, 2008.
- [3] C. Boutsidis and A. Gittens. Improved matrix algorithms via the Subsampled Randomized Hadamard Transform. *ArXiv e-prints*, Mar. 2012. To appear in the *SIAM Journal on Matrix Analysis and Applications*.

- [4] E. J. Cands. The restricted isometry property and its implications for compressed sensing. *Comptes Rendus Mathematique*, 346(910):589 – 592, 2008.
- [5] M. Charikar, K. Chen, and M. Farach-Colton. Finding frequent items in data streams. *Theoretical Computer Science*, 312(1):3 – 15, 2004.
- [6] K. L. Clarkson and D. P. Woodruff. Low rank approximation and regression in input sparsity time. In *Proceedings of the 45th annual ACM Symposium on Theory of Computing*, STOC ’13, pages 81–90, New York, NY, USA, 2013. ACM.
- [7] A. Dasgupta, P. Drineas, B. Harb, R. Kumar, and M. Mahoney. Sampling algorithms and coresets for  $\ell_p$  regression. *SIAM Journal on Computing*, 38(5):2060–2078, 2009.
- [8] A. Gilbert and P. Indyk. Sparse recovery using sparse matrices. *Proceedings of the IEEE*, 98(6):937–947, 2010.
- [9] G. H. Golub and C. F. van Loan. *Matrix computations* (3. ed.). Johns Hopkins University Press, 1996.
- [10] M. W. Mahoney, P. Drineas, M. Magdon-Ismail, and D. P. Woodruff. Fast approximation of matrix coherence and statistical leverage. In *Proceedings of the 29th International Conference on Machine Learning*, ICML ’12, 2012.
- [11] X. Meng and M. W. Mahoney. Low-distortion subspace embeddings in input-sparsity time and applications to robust linear regression. In *Proceedings of the 45th annual ACM Symposium on Theory of Computing*, STOC ’13, pages 91–100, New York, NY, USA, 2013. ACM.
- [12] J. Nelson and H. L. Nguyen. OSNAP: Faster numerical linear algebra algorithms via sparser subspace embeddings. *CoRR*, abs/1211.1002, 2012.
- [13] V. Pan. *Structured Matrices and Polynomials: Unified Superfast Algorithms*. Birkhauser/Springer, 2001.
- [14] C. Sohler and D. P. Woodruff. Subspace embeddings for the  $\ell_1$ -norm with applications. In *Proceedings of the 43rd annual ACM Symposium on Theory of Computing*, STOC ’11, pages 755–764, 2011.
- [15] Z. Tang. *Fast Transforms Based on Structured Matrices With Applications to The Fast Multi-pole Method*. PhD thesis, PhD Thesis, University of Maryland College Park, 2004.
- [16] D. P. Woodruff and Q. Zhang. Subspace embeddings and  $\ell_p$  regression using exponential random variables. In *COLT*, 2013.
